# Supplementary material
Source: PubMed Central journal article supplement (PMC3771075)
Supplement: NIHMS479362-supplement-Fig__S1.pdf [file NIHMS479362-supplement-Fig__S1.pdf]

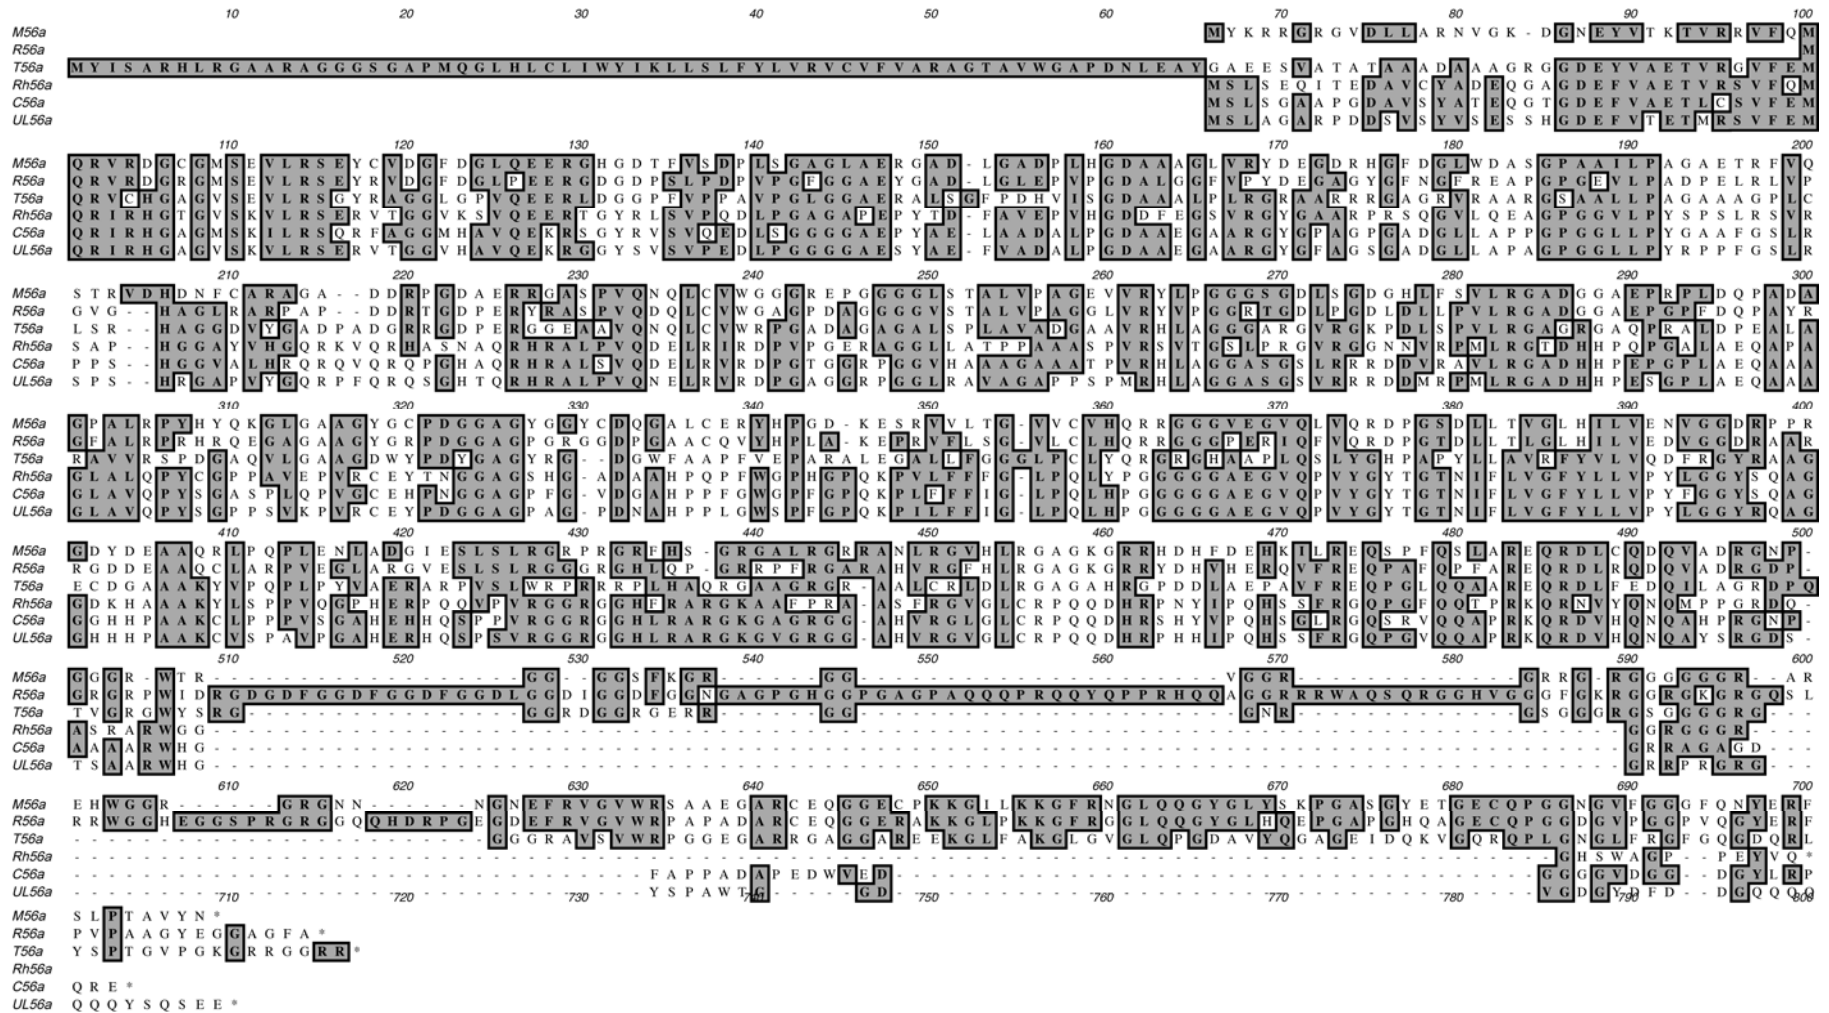

**Supplementary Fig. S1.** Amino acid sequence conservation among *UL56a* analogues. MacVector was used to identify ORFs similar to *UL56a* in the genomes of MCMV (GenBank accession no. NC\_004065), rat CMV (NC\_002512), rhesus CMV (AY186194), chimpanzee CMV (NC\_003521) and tupaia herpesvirus (AF281817). The amino acid sequences for hypothetical proteins encoded by these ORFs were deduced and compared using CLUSTAL W. *R56a*, Rat CMV; *T56a*, tupaia herpesvirus; *Rh56a*, rhesus CMV; *C56a*, chimpanzee CMV.
