# Supplementary material
Source: PubMed Central journal article supplement (PMC3771075)
Supplement: NIHMS479362-supplement-Table_S1.pdf [file NIHMS479362-supplement-Table_S1.pdf]

**Supplementary Table S1.** Sequences of primers used in this study

| PCR or plasmid | Primer name | Sequence (5'→3')*                             |
|----------------|-------------|-----------------------------------------------|
| A              | MOL128      | GAACATGGGACCGTTGAT                            |
|                | MOL129      | GTCTGTGCGCGGTATGTA                            |
| B              | MOL128      | (given above)                                 |
|                | MOL132      | ACATCATTGGCAACGCTACC                          |
| C              | MOL129      | (given above)                                 |
|                | MOL133      | GTCACTCATGGTGATTTCTC                          |
| D              | MOL130      | CGCACCTGACGAGATCCTCT                          |
|                | MOL134      | CGCTGCTGAGGGTGCACGAT                          |
| E              | MOL131      | ACTCCTTCTCCTTTCCCGTC                          |
|                | MOL135      | GTGTCGATTGCACGAATCGA                          |
| pMA178B        | MOL126      | GATCTCATATG                                   |
|                | MOL127      | AGCTCATATGA                                   |
| pMA212/219     | MOL129      | GTCTGTGCGCGGTATGTA                            |
|                | MOL153      | CCTCACTTGTACAGGCAA                            |
| pMA241         | MOL189      | CTGCGACCATATCACTATCA                          |
|                | MOL190      | CTGCTcGtCGAACGTCTCGT                          |
|                | MOL191      | GGCTTCGGCCAGTAACGTTA                          |
|                | MOL192      | TTCGaCgAGCAGTTGGCCTT                          |
| pMA245/249     | MOL210b     | CATATGCCAAGTACGCCCCCT                         |
|                | MOL211      | TTGCGCGCGAGCAGGTCGACTCaCCT                    |
| pMA291/292     | MOL237      | accatggTCACTTGTACAGGCAAGGAG                   |
|                | MOL242      | atggactacaaggacgacgacgacaagGCAATGAATACGTTACAA |

\*Nucleotides that differ from wild-type are indicated in lower case.
